# Supplementary material for: Ethnic specific association of the CAV1/CAV2 locus with primary open-angle glaucoma
Source: PubMed Central journal article supplement (PMC4906515; doi:10.1038/srep27837), 2016-06-14
Supplement: srep27837-s1.pdf [file srep27837-s1.pdf]

## **Ethnic specific association of the *CAVI/CAV2* locus with primary open-angle glaucoma**

Shi Song Rong<sup>1\*</sup>, Li Jia Chen<sup>1,2\*</sup>, Christopher K.S. Leung<sup>1\*</sup>, Kenji Matsushita<sup>3\*</sup>, Liyun Jia<sup>4</sup>, Atsuya Miki<sup>3</sup>, Sylvia W.Y. Chiang<sup>1</sup>, Pancy O.S. Tam<sup>1</sup>, Noriyasu Hashida<sup>3</sup>, Alvin L. Young<sup>2</sup>, Motokazu Tsujikawa<sup>3</sup>, Mingzhi Zhang<sup>5</sup>, Ningli Wang<sup>4</sup>, Kohji Nishida<sup>3</sup>, Chi Pui Pang<sup>1,2,5</sup>

\* These authors contributed equally to this study.

<sup>1</sup>Department of Ophthalmology and Visual Sciences, the Chinese University of Hong Kong, Hong Kong, China;

<sup>2</sup>Department of Ophthalmology and Visual Sciences, Prince of Wales Hospital, Hong Kong, China;

<sup>3</sup>Department of Ophthalmology, Osaka University Graduate School of Medicine, Suita, Osaka, Japan;

<sup>4</sup>Beijing Tongren Eye Center, Beijing Tongren Hospital, Capital Medical University, Beijing, China;

<sup>5</sup>Joint Shantou International Eye Center of Shantou University and the Chinese University of Hong Kong, Shantou, China.

Number of supplementary information: 4 supplementary tables and 1 supplementary figure

### **Correspondence:**

Dr. Li Jia Chen

Department of Ophthalmology and Visual Sciences, the Chinese University of Hong Kong  
Hong Kong Eye Hospital, 147K, Argyle Street, Kowloon, Hong Kong.

Phone: +852 39435810

Fax: +852 27159490

E-mail: [lijia\\_chen@cuhk.edu.hk](mailto:lijia_chen@cuhk.edu.hk)

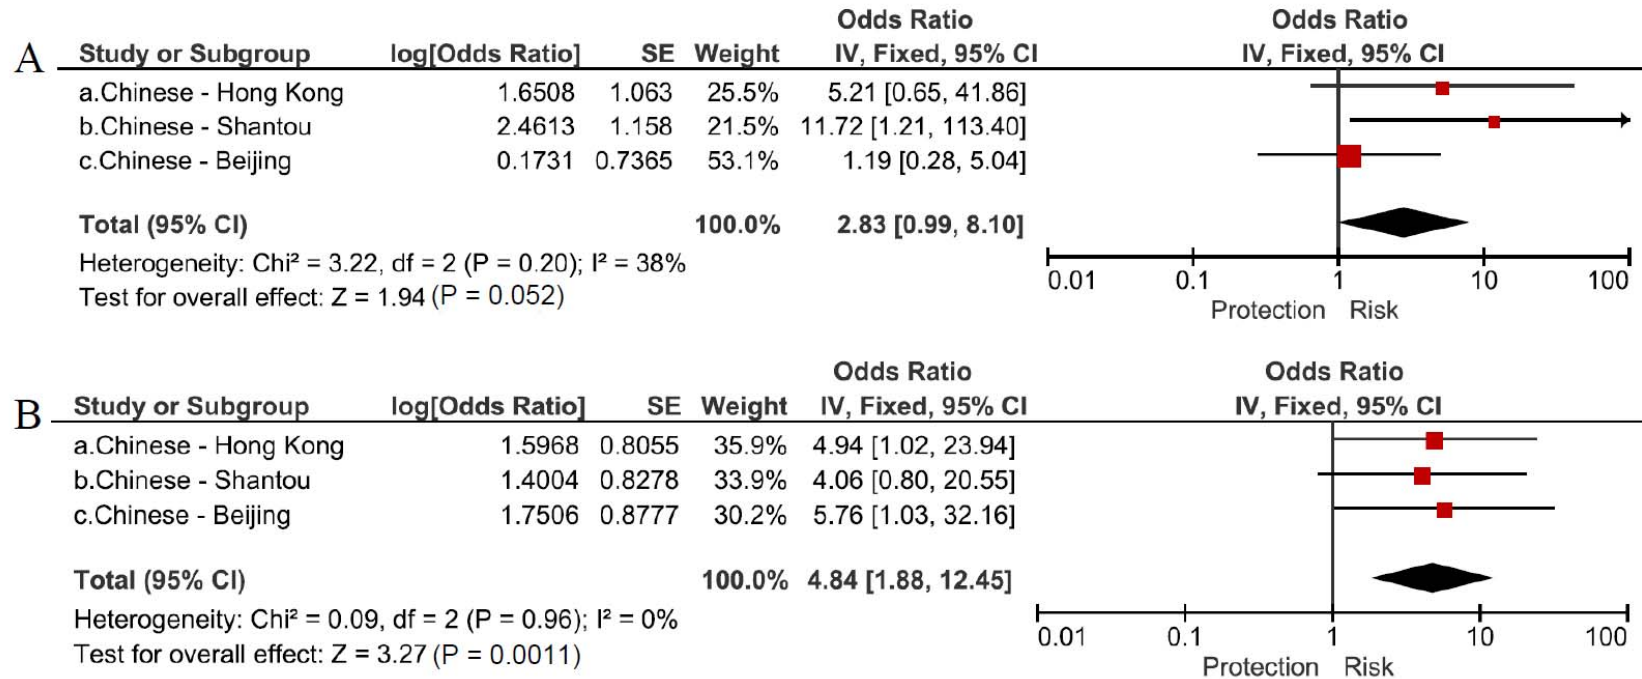

**Supplementary Fig S1. Association of rs4236601 with primary open-angle glaucoma in male and female subjects**

A. Meta-analysis performed in Chinese male subjects; B. Meta-analysis performed in Chinese female subjects

**Supplementary Table S1. Quality control results**

| No.                        | SNP       | Chr: position <sup>a</sup> | Genotype call rate<br>in all samples | Test for HWE in<br>controls (P) |
|----------------------------|-----------|----------------------------|--------------------------------------|---------------------------------|
| <b>Chinese - Hong Kong</b> |           |                            | <b>n=881</b>                         |                                 |
| 1                          | rs1052990 | 7: 116148370               | 0.980                                | 0.35                            |
| 2                          | rs6466579 | 7: 116151155               | 0.994                                | 0.87                            |
| 3                          | rs7801950 | 7: 116154783               | 0.995                                | 0.17                            |
| 4                          | rs4236601 | 7: 116162729               | 0.988                                | 1.00                            |
| 5                          | rs3779512 | 7: 116171063               | 0.992                                | 0.061                           |
| 6                          | rs3807989 | 7: 116186241               | 0.995                                | 0.78                            |
| 7                          | rs3801994 | 7: 116190469               | 0.994                                | 0.45                            |
| 8                          | rs1049337 | 7: 116200587               | 0.989                                | 1.00                            |
| <b>Chinese – Shantou</b>   |           |                            | <b>n=854</b>                         |                                 |
| 1                          | rs4236601 | 7: 116162729               | 0.984                                | 1.00                            |
| 2                          | rs3801994 | 7: 116190469               | 0.999                                | 0.19                            |
| <b>Chinese – Beijing</b>   |           |                            | <b>n=370</b>                         |                                 |
| 1                          | rs4236601 | 7: 116162729               | 1.00                                 | 1.00                            |
| 2                          | rs3801994 | 7: 116190469               | 1.00                                 | 0.64                            |
| <b>Japanese – Osaka</b>    |           |                            | <b>n=308</b>                         |                                 |
| 1                          | rs1052990 | 7: 116148370               | 0.996                                | 0.85                            |
| 2                          | rs4236601 | 7: 116162729               | 1.00                                 | Monomorphic                     |
| 3                          | rs3801994 | 7: 116190469               | 1.00                                 | 0.87                            |

<sup>a</sup> The position was aligned to GRCh37/hg19.

Chr: chromosome; HWE: Hardy-Weinberg equilibrium; SNP: single-nucleotide polymorphism.

**Supplementary Table S2. Association of rs4236601 with primary open-angle glaucoma conditioned on the other single nucleotide polymorphisms**

| No. | Adjusted SNP | MA | POAG vs. controls |                   |
|-----|--------------|----|-------------------|-------------------|
|     |              |    | P                 | OR (95% CI)       |
| 1   | rs1052990    | G  | <b>0.021</b>      | 4.43 (1.25-15.66) |
| 2   | rs6466579    | T  | <b>0.014</b>      | 4.80 (1.38-16.76) |
| 3   | rs7801950    | T  | <b>0.010</b>      | 5.13 (1.47-17.86) |
| 4   | rs4236601    | A  | n.a.              | n.a.              |
| 5   | rs3779512    | T  | <b>0.0080</b>     | 5.62 (1.57-20.16) |
| 6   | rs3807989    | A  | <b>0.016</b>      | 4.62 (1.33-16.13) |
| 7   | rs3801994    | A  | <b>0.0088</b>     | 5.31 (1.52-18.50) |
| 8   | rs1049337    | C  | <b>0.011</b>      | 5.08 (1.46-17.72) |

CI: confidence interval; MA: minor allele; n.a.: not applicable; OR: odds ratio; POAG: primary open-angle glaucoma; SNP: single-nucleotide polymorphism

**Supplementary Table S3. Association of rs3809916 with primary open-angle glaucoma conditioned on the other single nucleotide polymorphisms**

| No. | Adjusted SNP | MA | POAG vs. controls |                  |
|-----|--------------|----|-------------------|------------------|
|     |              |    | P                 | OR (95% CI)      |
| 1   | rs1052990    | G  | 0.10              | 1.31 (0.95-1.79) |
| 2   | rs6466579    | T  | <b>0.035</b>      | 1.36 (1.02-1.80) |
| 3   | rs7801950    | T  | 0.091             | 1.31 (0.96-1.80) |
| 4   | rs4236601    | A  | <b>0.038</b>      | 1.22 (1.00-1.61) |
| 5   | rs3779512    | T  | 0.055             | 1.29 (0.99-1.67) |
| 6   | rs3807989    | A  | 0.159             | 1.32 (0.90-1.94) |
| 7   | rs3801994    | A  | n.a.              | n.a.             |
| 8   | rs1049337    | C  | <b>0.038</b>      | 1.31 (1.02-1.70) |

CI: confidence interval; MA: minor allele; n.a.: not applicable; OR: odds ratio; POAG: primary open-angle glaucoma; SNP: single-nucleotide polymorphism

**Supplementary Table S4. Selection of SNPs to be tested in the *CAVI/CAV2* locus**

| No. | SNP       | NCBI36/hg18                                  | Distance to a gene (bp) | MA | MAF in CHB | Reason for selection                                  | Reference |
|-----|-----------|----------------------------------------------|-------------------------|----|------------|-------------------------------------------------------|-----------|
| 1   | rs1052990 | c.*2195T>G,<br>downstream of <i>CAV2</i>     | 2,677                   | G  | 0.173      | POAG GWAS                                             | 1         |
| 2   | rs6466579 | g.115938641T>C,<br>downstream of <i>CAV2</i> | 2,810                   | T  | 0.278      | Tag SNP                                               | -         |
| 3   | rs7801950 | g.115942269C>T,<br>downstream of <i>CAV2</i> | 6,438                   | T  | 0.189      | Tag SNP                                               | -         |
| 4   | rs4236601 | g.115949965G>A,<br>upstream of <i>CAVI</i>   | 2,110                   | A  | 0.017      | POAG GWAS                                             | 1         |
| 5   | rs3779512 | <i>CAVI</i><br>c.102+4320T>G                 | Intron 2                | T  | 0.100      | Tag SNP                                               | -         |
| 6   | rs3807989 | <i>CAVI</i><br>c.103-12759A>G                | Intron 2                | A  | 0.289      | Tag SNP; ECG P-R<br>interval & atrial<br>fibrillation | 2         |
| 7   | rs3801994 | <i>CAVI</i><br>c.103-8531G>A                 | Intron 2                | A  | 0.189      | Tag SNP                                               | -         |
| 8   | rs1049337 | <i>CAVI</i><br>c.*1246C>T                    | 1,246                   | T  | 0.477      | Tag SNP                                               | -         |

*CAVI*: caveolin 1; *CAV2*: caveolin 2; CHB: Chinese Han Beijing; ECG: electrocardiogram; MA: minor allele; MAF: minor allele frequency; NCBI: National Center for Biotechnology Information; SNP: single nucleotide polymorphism; GWAS: genome-wide association study

**Reference**

- 1 Thorleifsson, G. *et al.* Common variants near CAV1 and CAV2 are associated with primary open-angle glaucoma. *Nat Genet* **42**, 906-909, (2010).
- 2 Holm, H. *et al.* Several common variants modulate heart rate, PR interval and QRS duration. *Nat Genet* **42**, 117-122, (2010).
